# Supplementary material for: Contiguity-based sound iconicity: The meaning of words resonates with phonetic properties of their immediate verbal contexts
Source: PLoS One. 2019 May 16;14(5):e0216930. doi: 10.1371/journal.pone.0216930 (PMC6522027; doi:10.1371/journal.pone.0216930)
Supplement: S1 Data — The folder contains three files. Data used in the analysis are listed in allSamples.tab, which contains a table with one line per sample and nine columns: SampleNr (running index per sample), TitleNr (running index per title), AuthorNr (running index per author), Category (SMALL vs. LARGE), KW (the target word in English), F1 (frequency of the first formant in Mel), F2 (frequency of the second formant in Mel), dF (distance between F1 and F2), and Sample (line extracted from poem). The files allTitles.tab and allAuthors.tab list the titles and authors, respectively. (ZIP) [file pone.0216930.s006.zip]

Archive with 3 entries (3 files):
- S6 Data/allAuthors.tab
- S6 Data/allSamples.tab
- S6 Data/allTitles.tab
