# Supplementary material for: Contiguity-based sound iconicity: The meaning of words resonates with phonetic properties of their immediate verbal contexts
Source: PLoS One. 2019 May 16;14(5):e0216930. doi: 10.1371/journal.pone.0216930 (PMC6522027; doi:10.1371/journal.pone.0216930)
Supplement: S1 Data — The folder contains three files. Data used in the analysis are listed in allSamples.tab, which contains a table with one line per sample and nine columns: SampleNr (running index per sample), TitleNr (running index per title), AuthorNr (running index per author), Category (SMALL vs. LARGE), KW (the target word in English), F1 (frequency of the first formant in Mel), F2 (frequency of the second formant in Mel), dF (distance between F1 and F2), and Sample (line extracted from poem). The files allTitles.tab and allAuthors.tab list the titles and authors, respectively. (ZIP) [file pone.0216930.s006.zip › S6 Data/allAuthors.tab]

AuthorNr	Name	Pen-Name
1	Gottfried August Bürger	Jocosus Hilarius
2	Annette Freiin von Droste-Hülshoff
3	Emanuel Geibel
4	Johann Wolfgang von Goethe
5	Hugo von Hofmannsthal
6	Wilhelm Müller
7	Conrad Ferdinand Meyer
8	Novalis	Friedrich von Hardenberg
9	Rainer Maria Rilke
10	Johann Christoph Friedrich von Schiller
11	Carl Spitteler
12	Georg Trakl
13	Christian Fürchtegott Gellert
14	Heinrich Heine
15	August Heinrich Hoffmann von Fallersleben	Henricus Custos
16	Gottfried Keller
17	Ewald Christian von Kleist
18	Jakob Michael Reinhold Lenz
19	Ernst Wilhelm Lotz
20	Eduard Mörike
21	Wolfgang Müller von Königswinter
22	Ludwig Pfau
23	Karl August Graf von Platen Hallermund	Platen-Hallermünde
24	Friedrich Rückert	Reimar
25	August Wilhelm von Schlegel
26	Christian Daniel Friedrich Schubart
27	Georg Wilhelm Heinrich Häring	Wilibald Alexis
28	Hermann Allmers
29	Ernst Moritz Arndt
30	Ludwig Joachim von Arnim	Achim von Arnim
32	Clemens Brentano	Maria
33	Barthold Hinrich Brockes
34	Louis Charles Adelaide de Chamisso de Boncourt	Chamisso, Adelbert von
35	Matthias Claudius
36	Richard Dehmel
37	Georg Christian Dieffenbach
38	Marie Freifrau von Ebner-Eschenbach
39	Joseph Freiherr von Eichendorff
40	Theodor Fontane
41	Ferdinand Freiligrath
42	Stefan George
43	Hermann von Gilm zu Rosenegg
44	Leopold Friedrich Günther von Goeckingk
45	Anton Alexander Graf von Auersperg	Anastasius Grün
46	Friedrich Hermann Frey	Martin Greif
47	Friedrich Hölderlin
48	Ludwig Christoph Heinrich Hölty
49	Albrecht von Haller
50	Friedrich Hebbel
51	Wilhelm Hey
52	Johann Georg Jacobi
53	Justinus Christian Andreas Kerner	Schattenspieler Luchs
54	Johann Friedrich Kind	Oscar
55	August Kopisch
56	Hermann Kurz
57	Lenau	Nikolaus Edler Niembsch von Strehlenau
58	Gotthold Ephraim Lessing
59	Alfred Lichtenstein
60	Detlev von Liliencron
61	Friedrich Müller	Maler Müller
62	Agnes Miegel
63	Christian Morgenstern
64	Christian Adolf Overbeck
65	Robert Ernst Prutz
66	Karl Wilhelm Ramler
67	Robert Reinick
68	Christian Friedrich Scherenberg
69	Hermann Schmid
70	Georg Philipp Schmidt	Schmidt von Lübeck
71	Aloys Schreiber
72	Gustav Schwab
73	Johann Gottfried Seume
74	Theodor Storm
75	Karl Streckfuß
76	Ludwig Tieck
77	Ludwig Uhland
78	Joseph Christian Freiherr von Zedlitz
79	Gustav Pfizer
80	Joseph Victor von Scheffel
81	Johann Heinrich Voss	Voß
82	Georg Herwegh
83	Arno Holz
85	Otto Friedrich Gruppe
87	Georg Heym
88	Karl von Holtei
90	Franz Kugler	F. Th. Erwin
91	Karl Egon Ebert	Franta Wokrauliczek
92	Johann Wilhelm Ludwig Gleim
93	Friedrich von Hagedorn
95	Friedrich Gottlieb Klopstock
96	Friedrich von Matthisson
97	Karl Simrock
98	Ernst Stadler
99	Nicolaus Becker
100	Matthäus Friedrich Chemnitz
101	Gustav Falke
102	Johann Christian Günther
103	Gottfried Kinkel
104	Rudolph Löwenstein
105	Heinrich von Mühler
106	Friedrich Wilhelm Joseph von Schelling
107	Friedrich Leopold Graf zu Stolberg
108	David Friedrich Strauß
109	Wilhelm Heinrich Wackenroder
110	Frank Wedekind
111	Johann Gottfried Herder
112	Theodor Körner
113	Max von Schenkendorf
114	August Schnezler
115	Karoline Marie Louise Brachmann
117	Adolf Friedrich von Schack
118	Heinrich von Kleist
119	Friedrich Schlegel
120	August Stöber
121	Moritz Graf von Strachwitz
122	Balthasar Wilhelm Friedrich Zimmermann
125	Johann Nepomuk Vogl
130	Karl Leberecht Immermann
131	Max Schneckenburger
132	Johann Gabriel Seidl
133	Carl Bernhard von Trinius
134	Adolf Böttger
135	Theodor Däubler
136	Friedrich Nietzsche
139	Ludwig Giesebrecht
140	Magnus Gottfried Lichtwer
141	Ferdinand Raimund
142	Maximilian Dauthendey
143	Ernst Freiherr von Feuchtersleben
144	Moritz Hartmann
145	Hermann Lingg
146	Johann Benjamin Michaelis
147	Julius Minding
148	Max von Oër
150	Alexander Graf von Württemberg
155	Johann Jacob Bodmer
157	Friedrich Rückert
