# Supplementary material for: Contiguity-based sound iconicity: The meaning of words resonates with phonetic properties of their immediate verbal contexts
Source: PLoS One. 2019 May 16;14(5):e0216930. doi: 10.1371/journal.pone.0216930 (PMC6522027; doi:10.1371/journal.pone.0216930)
Supplement: S1 Data — The folder contains three files. Data used in the analysis are listed in allSamples.tab, which contains a table with one line per sample and nine columns: SampleNr (running index per sample), TitleNr (running index per title), AuthorNr (running index per author), Category (SMALL vs. LARGE), KW (the target word in English), F1 (frequency of the first formant in Mel), F2 (frequency of the second formant in Mel), dF (distance between F1 and F2), and Sample (line extracted from poem). The files allTitles.tab and allAuthors.tab list the titles and authors, respectively. (ZIP) [file pone.0216930.s006.zip › S6 Data/allSamples.tab]

SampleNr	TitleNr	AuthorNr	Category	KW	F1	F2	dF	Sample
43	40	1	SMALL	small	528	1530	1002	Da sprang wie ein Böcklein der Abt vor Behagen
44	41	1	SMALL	small	488	1323	836	Gott hatt ihm verliehen ein Stücklein Brot
45	42	1	SMALL	small	426	1118	691	Weit weit von hier Still kühl und klein
1555	40	1	LARGE	large	576	1452	876	Herr Kaiser groß hab ich so eben nichts nötig
1556	42	1	LARGE	large	590	1442	852	Ach großes Leid erlitten
1554	758	1	LARGE	large	593	1170	577	Ein Schwarm von Gaffern groß und klein
298	41	1	SMALL	tiny	482	1305	824	Sie trug ein zierlich beschriebenes Blatt
1825	302	1	LARGE	gigantic	582	1239	656	Fährt eine schwarze Riesen Faust
572	395	1	SMALL	delicate	506	1444	938	Weber webe zart und fein
2240	758	1	LARGE	rough	565	1453	888	Mit grobem Kittel angetan
1	1	1	SMALL	fearful	597	1199	602	Von ängstlichen Träumen erschütterten sie
76	64	2	SMALL	small	645	1040	394	So reich und mächtig so arm und klein
78	66	2	SMALL	small	508	1330	822	Es war ihr kleines Eigenthum
81	67	2	SMALL	small	400	1648	1248	Wie mag er zierlich liegen Kleines Ding
83	67	2	SMALL	small	482	1367	885	Siehst über einem kleinen Hügel schwanken
85	69	2	SMALL	small	509	1067	558	Ich sah mich selber gar gebückt und klein
1586	640	2	LARGE	large	562	1439	876	Gott segne ihn Gott mach ihn groß
302	67	2	SMALL	tiny	547	1475	928	Wie mag er zierlich liegen Kleines Ding
1826	218	2	LARGE	gigantic	493	1209	716	Seltsamer Troß hier Riesen Bau
1827	827	2	LARGE	gigantic	545	1258	713	Durch Riesen Halme wie Speere
525	67	2	SMALL	weak	645	1058	412	Wie brennt die Stirn Sie hebt das Auge schwach
526	67	2	SMALL	weak	457	1602	1145	Wie war es nur doch ihr Gehirn ist schwach
527	239	2	SMALL	weak	519	1191	672	War das ein Geisterlaut so schwach und leicht
523	367	2	SMALL	weak	457	1602	1145	Ein schwaches Schrillen ein Gezische
524	367	2	SMALL	weak	419	1515	1095	Und plötzlich scheint ein schwaches Glühen
2150	65	2	LARGE	strong	565	1443	878	Da bricht ein starker Knabe
2151	641	2	LARGE	strong	697	1335	638	Der starke Mann da zischend dringt
2152	845	2	LARGE	strong	519	1433	913	Da plötzlich fühlt er starke Hände
581	66	2	SMALL	delicate	457	1602	1145	Der Handel ist ein zart
585	70	2	SMALL	delicate	476	1432	957	Träumt nicht die zarteste Flocke
586	70	2	SMALL	delicate	590	1422	832	Seinen zarten schwächlichen Knaben
583	239	2	SMALL	delicate	549	1452	903	Der zartren Nerve Fluch du oder Segen
584	399	2	SMALL	delicate	512	1416	904	Des Lebens zarten Widerschein geschlungen
2294	918	2	LARGE	rough	574	1390	815	Und Dieser ists vom groben Pelz bedeckt So ausgespannt wie sich die Leiche streckt
2	2	2	SMALL	fearful	582	1227	644	Im Walde gleitet ängstliches Gemunkel
15	15	2	SMALL	fearful	485	1611	1126	Verschrien gefürchtet in dem Reich
1603	446	3	LARGE	large	539	1422	883	Bis der große Morgen plötzlich
1604	465	3	LARGE	large	511	1523	1011	Es ist ein großer Maientag
1602	564	3	LARGE	large	650	1206	555	Der Wurm saß drin aus jeder groß Tat sahn
1600	652	3	LARGE	large	694	1331	636	Der Herr hat Großes
1601	773	3	LARGE	large	458	1365	908	Daß sie kein großer Puls durchbebt
2162	243	3	LARGE	strong	499	1379	880	Und stark der Geist der Lügen
2164	468	3	LARGE	strong	527	1493	966	Es macht mich stark wie Wein
2160	652	3	LARGE	strong	568	948	380	Kam fromm und stark
2161	849	3	LARGE	strong	457	1602	1145	lustig Bruder Dein Wein ist stark
2163	901	3	LARGE	strong	615	1421	806	Es brach schon manch ein starkes Herz
100	81	4	SMALL	small	532	1540	1008	Was der Beste im Kleinen
101	82	4	SMALL	small	400	1171	770	Macht euren Gegner nur nicht klein
104	85	4	SMALL	small	469	1274	804	Kleine Blumen Kleine Blätter
105	86	4	SMALL	small	565	1443	878	Oft bei einer kleinen Gabe
107	88	4	SMALL	small	527	1156	628	Geselle dich zur kleinsten Schar
108	89	4	SMALL	small	614	1414	800	Der kleine schwarze feurige Bauer
1616	82	4	LARGE	large	523	1395	872	Bei einer großen Wassersnot
1625	220	4	LARGE	large	625	1328	703	Und wölbt sich nicht das überweltlich Große
1613	310	4	LARGE	large	562	1439	876	Der Tag wie lieblich so die Nacht wie groß
1623	470	4	LARGE	large	534	1094	558	Ist er ewig schön und groß
1621	776	4	LARGE	large	494	1192	698	Herr die Not ist groß
304	220	4	SMALL	tiny	564	1130	565	Wie leicht und zierlich klar und zart gewoben
305	221	4	SMALL	tiny	498	1428	930	Fragt niemand mehr und zierlich tätge Glieder
306	222	4	SMALL	tiny	507	1561	1054	Grabet euer Feld ins zierlich Reine
1829	82	4	LARGE	gigantic	548	1412	863	Wie erhabne Riesen Säulen
1830	828	4	LARGE	gigantic	514	1100	585	Auf den Riesen Schultern sausend
531	371	4	SMALL	weak	523	1395	872	Sei kein schwaches Rosenband
2167	903	4	LARGE	strong	444	1241	797	Und er kommt Vor seinem starken Wüten
591	220	4	SMALL	delicate	565	1462	897	Die Stunden glichen sich in zartem Wandern
592	220	4	SMALL	delicate	607	934	327	Wie leicht und zierlich klar und zart gewoben
2254	221	4	LARGE	rough	493	1197	704	Und derbe Knochen die sich tödlich schlugen
2299	920	4	LARGE	rough	513	1401	888	Jeder sollte freilich grob sein
4	4	4	SMALL	fearful	437	1410	973	Die Kinderlein ängstlich gen Hause so schnell
17	17	4	SMALL	fearful	469	1592	1122	Wird ihm des gefürchteten Gipfels
133	113	5	SMALL	small	432	1623	1191	Wie kleine Mädchen die sehr blass aussehn
134	114	5	SMALL	small	444	1528	1084	Flog nicht übern kleinen Weg
135	115	5	SMALL	small	474	1379	904	Herüberglitt aus einem kleinen Kind
136	116	5	SMALL	small	437	1398	961	Wie kleine Kinder unter Kirschenbäumen
137	117	5	SMALL	small	602	1122	520	Im Traum als kleine Mädchen uns entgegen
1674	276	5	LARGE	large	538	931	392	Daß sie herkamen trauervoll und groß
1675	276	5	LARGE	large	697	1335	638	Genoß er allen Lebens großen Gang
1676	276	5	LARGE	large	516	1443	927	So sehr daß er in großer Trunkenheit
1677	673	5	LARGE	large	537	1344	807	Wie einer weint wenn er auf großem Seeschiff
1678	673	5	LARGE	large	685	1310	625	Das große Seeschiff aber trägt ihn weiter
1671	786	5	LARGE	large	493	1303	810	Die wir doch groß und ewig einsam sind
1820	276	5	LARGE	gigantic	523	1386	863	Sich riesige Opale in den Händen
1838	673	5	LARGE	gigantic	531	1590	1059	Mit gelben Riesen Segeln gegen Abend
1839	673	5	LARGE	gigantic	603	1447	843	Mit gelben fremdgeformten Riesen Segeln
538	375	5	SMALL	weak	474	1255	781	Dem starken Duft der schwachen Frühlingsblumen
2184	278	5	LARGE	strong	499	1105	606	Kommen schon auf starken Schwingen
2182	375	5	LARGE	strong	523	1392	869	Dem starken Duft der schwachen Frühlingsblumen
2183	857	5	LARGE	strong	523	1344	821	Stark und stärker wird ihr
6	6	5	SMALL	fearful	437	1398	961	Die ängstlich sind und weinen wollen sieht
199	162	6	SMALL	small	598	1342	743	Und von dem kleinen Kahne gings flugs ins große Schiff
200	162	6	SMALL	small	450	1271	821	Glück zu mit deinem Schwerte du kleiner Hydriot
201	163	6	SMALL	small	524	1326	801	Und sein kleiner Teller
202	164	6	SMALL	small	481	1615	1133	Steht ein kleiner Leichenstein
203	165	6	SMALL	small	574	1218	644	Mit kleinen Blumenknospen an
204	166	6	SMALL	small	507	1280	772	In dem traulich kleinem Raum
1847	164	6	LARGE	gigantic	488	1220	732	Und mit riesen großer Schrift
7	7	6	SMALL	fearful	588	1290	701	Er trippelt ängstlich durch das Haus
205	167	7	SMALL	small	524	1326	801	Eine kurze kleine Strecke
206	168	7	SMALL	small	400	1171	770	Er ließ mir Tag und Sonne Mein übrig Gut ist klein
208	170	7	SMALL	small	487	1357	869	Die Kleine schlummert fest in ihrer Nacht
211	171	7	SMALL	small	531	1574	1042	Wird der Kleinen Menge
212	172	7	SMALL	small	729	1122	393	Hält das Boot an manchem kleinen Port
214	174	7	SMALL	small	438	1145	707	Die kleinste Spur von dir die flüchtigste
1731	300	7	LARGE	large	589	1475	886	Das sind große Heere
1732	301	7	LARGE	large	494	1621	1128	Große Heere nicht ein einzler Rufer
1726	800	7	LARGE	large	438	1145	707	Es kommt die große Ruh
1728	801	7	LARGE	large	621	1262	640	Sprich wessen ist das große dort
1729	802	7	LARGE	large	639	1434	794	Gilbert fragt die Sarazenin im Gedräng der großen Stadt
1730	803	7	LARGE	large	474	1379	904	Er nickt mit seinem großen Haupt
1848	298	7	LARGE	gigantic	583	1295	712	Zur Stunde da die Riesen Stadt durchstürmen
549	382	7	SMALL	weak	607	1358	751	Von eines weiten Herdes Feuer schwach erhellt
550	383	7	SMALL	weak	569	1330	761	Daß der Schwache nicht zum Raube
551	384	7	SMALL	weak	457	1602	1145	Es war Zeit ein schwaches Flimmerlicht
2200	383	7	LARGE	strong	497	1434	937	Wird erblühn mit starken Söhnen
2201	691	7	LARGE	strong	539	1173	633	Dessen Pulse stark und feurig schlugen
615	174	7	SMALL	delicate	621	1257	636	Erblickt ich mit des Busens zartem Bug
616	174	7	SMALL	delicate	494	1192	698	Zarter Sohlen Bildnis eingegraben
612	410	7	SMALL	delicate	527	1375	848	Wie beschämst du deine Brüder Zarter was tust du
613	411	7	SMALL	delicate	593	1170	577	Und liesest du ein Wort das zart und eigen
614	412	7	SMALL	delicate	442	1360	918	Mit Zügen kindlich zart und rein
8	8	7	SMALL	fearful	457	1602	1145	Dunkel gekleidet mit ängstlichen Schritten
26	26	7	SMALL	fearful	444	1327	884	Was meine Seele fürchtest du
1529	742	7	LARGE	angry	607	1479	871	Verdoppelt tobt des Sturmes Wut
1530	742	7	LARGE	angry	607	1479	871	Doch endlich bricht des Sturmes Wut
1531	742	7	LARGE	angry	428	1625	1196	Er zerrt mit widerwillger Wut
1532	743	7	LARGE	angry	484	1389	904	Die tote Wut erwecke nicht
217	177	8	SMALL	small	430	1276	846	Viel klein Odien und Juwelen
1849	177	8	LARGE	gigantic	506	1594	1088	Der Gestirne Riesen Geister
1850	344	8	LARGE	gigantic	576	1224	648	rastlosen Gestirne Riesen Welt und schwimmt tanzend in seiner blauen Flut atmet es der
618	177	8	SMALL	delicate	437	1193	757	Wird zu weichen zarten Brüsten
617	342	8	SMALL	delicate	538	1414	876	Der zarte Schoß quillt still empor
620	344	8	SMALL	delicate	386	1660	1274	sendet mir dich zarte Geliebte liebliche Sonne der Nacht nun wach ich denn ich bin
619	413	8	SMALL	delicate	522	1334	812	nicht daß du es bist der des zarten Mädchens Busen umschwebt und zum Himmel den Schoß
9	9	8	SMALL	fearful	538	1414	876	So ängstlich leise her
1533	744	8	LARGE	angry	526	1404	878	Der Schmerzen Wut und wilder Stoß
231	190	9	SMALL	small	475	1612	1136	sich eine kleine Weile der Bestand
232	190	9	SMALL	small	524	1338	813	ein kleines blaues Mädchen aufgeschnallt
233	190	9	SMALL	small	556	1507	950	und hält sich mit der kleinen heißen Hand
234	190	9	SMALL	small	531	1178	647	ein kleines kaum begonnenes Profil
235	191	9	SMALL	small	475	1612	1136	der sich im allerkleinsten Kreise dreht
236	192	9	SMALL	small	694	1331	636	Kleine Wasser ändern die Betonung
1755	494	9	LARGE	large	501	1268	766	und jener große graue blinde Teich
1756	494	9	LARGE	large	457	1602	1145	in großen Bissen seine Hände hingen
1757	494	9	LARGE	large	500	1159	659	so war sie voll von ihrem großen Tode
1752	813	9	LARGE	large	590	1339	750	da doch die großen fremden Gedanken bei dir
1753	813	9	LARGE	large	485	1348	862	milde der Mutter entwächst Aber wir die so große
1754	814	9	LARGE	large	656	1382	727	Herr es ist Zeit Der Sommer war sehr groß
1823	813	9	LARGE	gigantic	406	1358	952	Heilige hörten daß die der riesige Ruf
555	387	9	SMALL	weak	521	1456	935	die schwache Lampe überredet linde
2209	191	9	LARGE	strong	565	1462	897	Der weiche Gang geschmeidig starker Schritte
2212	387	9	LARGE	strong	622	1196	574	Die Nacht ist stark doch von so fernem Gange
2210	813	9	LARGE	strong	390	1228	838	alle den Fehler daß sie zu stark unterscheiden
2211	911	9	LARGE	strong	400	1560	1159	wird ein Starkes über dieser Nahrung
10	10	9	SMALL	fearful	529	1469	939	das was man war in unendlich ängstlichen Händen
239	194	10	SMALL	small	541	1457	916	Ein Glöcklein hört er erklingen fern
1772	194	10	LARGE	large	596	1165	568	nächsten Kaiserwahl die auf das große Interregnum
1776	354	10	LARGE	large	556	1513	956	Meldeten den großen Freudebringer
1769	537	10	LARGE	large	694	1302	608	Groß zwar nenn ich den Mann der sein eigner Bildner und Schöpfer
1765	816	10	LARGE	large	574	1302	727	Was den großen Ring bewohnet
1767	816	10	LARGE	large	518	1246	729	wird ein großer Gott belohnen
1768	816	10	LARGE	large	426	836	409	Groß Mut auch dem Bösewicht
319	230	10	SMALL	tiny	522	1476	953	Die in den zierlichen Leib grausam der Eber geritzt
1856	355	10	LARGE	gigantic	637	1388	750	Es steigt das Riesen Maß der Leiber
1857	819	10	LARGE	gigantic	607	1240	633	Der Riesen Schatten unsrer eignen Schrecken
1855	836	10	LARGE	gigantic	547	1298	750	Wo ein verschleiert Bild von Riesen Größe
559	194	10	SMALL	weak	451	1567	1116	Nicht fürchtet der Schwache der Friedliche mehr
560	194	10	SMALL	weak	542	1583	1041	Der das Flehen der Schwachen erhöret
558	352	10	SMALL	weak	542	1328	787	Was durch die schwache Kraft entspringt
2218	351	10	LARGE	strong	528	1291	763	Nur der Starke wird das Schicksal zwingen
2219	352	10	LARGE	strong	499	1093	594	Wo Starkes sich und Mildes paarten
2217	816	10	LARGE	strong	444	1646	1202	Freude heißt die starke Feder
625	351	10	SMALL	delicate	489	1434	944	Aufgelöst in zarter Wechselliebe
626	352	10	SMALL	delicate	527	1312	784	Der Mutterliebe zarte Sorgen
628	352	10	SMALL	delicate	494	1621	1128	Denn wo das Strenge mit dem Zarten
629	352	10	SMALL	delicate	569	1325	755	Aus der zarten Kinder Schar
631	354	10	SMALL	delicate	607	1370	764	Selbst des Lebens zarter Faden schlüpfte
632	354	10	SMALL	delicate	437	1668	1230	Zarte Wesen die ein Weib gebar
11	11	10	SMALL	fearful	511	1532	1021	Fragen sich einander ängstlich leise
31	31	10	SMALL	fearful	589	1475	886	Nicht fürchtet der Schwache der Friedliche mehr
32	32	10	SMALL	fearful	576	1214	638	Doch fürchte seinen Unbestand
1537	746	10	LARGE	angry	560	1262	702	Was Feuers Wut ihm auch geraubt
1538	747	10	LARGE	angry	582	1333	750	Aufsteht mit des Verbrechens Wut und des Elends die Menschheit
1539	748	10	LARGE	angry	568	1130	561	Doch wachsend erneut sich des Stromes Wut
1540	749	10	LARGE	angry	494	1192	698	Das Volk es fodert seine Wut
255	204	11	SMALL	small	426	1332	906	Zappelnd schreit die Kleine Böser Bube du
256	205	11	SMALL	small	520	1268	748	O weh der Jungfern kleinste
12	12	11	SMALL	fearful	574	1516	942	Den Finger ängstlich an dem Mund
1791	439	12	LARGE	large	615	1402	787	Die purpurnen Martern Klage eines großen Geschlechts
1790	619	12	LARGE	large	534	1264	730	Großer Fürsten schöne Schilder
13	13	12	SMALL	fearful	528	1490	962	Sieh ein ängstlicher Kahn versinkt
96	77	13	SMALL	small	492	1211	719	Den kleinsten Staub fühllos beschaun
1605	774	13	LARGE	large	632	1202	569	Zu seinem Unglück kam ein großer Hund gerannt
1606	774	13	LARGE	large	527	1474	947	Wie groß sag ich daß er gewesen wär
1607	774	13	LARGE	large	511	1384	873	Wie Euer großes Pferd Dazu will viel gehören
1608	774	13	LARGE	large	699	1211	512	Daß er so groß als mancher Ochse war
1609	774	13	LARGE	large	632	1167	534	War groß und wenn ich ihn auch was vergrößert hätte
2165	566	13	LARGE	strong	429	1386	958	So wird dein starker Fuß mein Bein
16	16	13	SMALL	fearful	585	1459	874	Und alle Welt fürcht ihren Herrn
124	104	14	SMALL	small	563	1360	797	Mit kleinen horchenden Herzen
125	105	14	SMALL	small	457	1602	1145	Den Schiffer im kleinen Schiffe
127	107	14	SMALL	small	488	1220	732	Zwei Kinder klein und froh
128	108	14	SMALL	small	615	1421	806	Drei kleine Narben Denkmäler der Lust
129	109	14	SMALL	small	508	1188	680	Plattköpfig breitmäulig und klein
1647	104	14	LARGE	large	519	1551	1031	Während die großen Mädchen
1650	108	14	LARGE	large	530	1497	967	Der große Komet der heuer
1648	327	14	LARGE	large	552	901	350	Wo große Blumen schmachten
1649	782	14	LARGE	large	668	1375	707	Besiegt und zerschlagen das große Heer
1833	109	14	LARGE	gigantic	487	1158	671	Und Riesen Bäume blühn
598	403	14	SMALL	delicate	584	1155	571	Die Damen von zartem Gefühl
2300	921	14	LARGE	rough	675	1357	682	Und an jeden groben Kellner Hab ich mich umsonst gewandt
18	18	14	SMALL	fearful	538	1497	959	Die Herzogin lacht Ich fürchte mich nicht
131	111	15	SMALL	small	507	1561	1054	Lebst du in deiner kleinen Welt
132	112	15	SMALL	small	556	1292	736	Du hast dein Völklein wohl geleitet
1670	331	15	LARGE	large	527	1493	966	Die hatten großen Streit
2302	923	15	LARGE	rough	550	1330	780	Wenn wir mit so grobem Knüppel kämen
19	19	15	SMALL	fearful	419	1633	1214	Ihr Kindlein fürchtet nichts
139	119	16	SMALL	small	443	1498	1055	Noch zwei Fünklein sieht sie glimmend stehn
140	120	16	SMALL	small	507	1561	1054	Jedes erbt ein kleines Reich
141	121	16	SMALL	small	582	1341	759	Laß dein Glöcklein stürmen
142	122	16	SMALL	small	488	1435	946	Hab ich dich Kleiner wert und lieb gewonnen
143	123	16	SMALL	small	565	1462	897	O Schreck so ist kein Glöcklein da
152	128	16	SMALL	small	513	1401	888	untern Tisch des Brots ein kleiner Bissen
1683	120	16	LARGE	large	442	1210	768	Großen Unfug treibt mein Herz
1684	122	16	LARGE	large	432	1267	835	Ja vor viel Großem unter dieser Sonnen
1685	122	16	LARGE	large	499	1391	892	Wie hoch du steigest auf der großen Leiter
1687	788	16	LARGE	large	547	1490	942	Der Pfaff mit großem Messer hieb
1688	789	16	LARGE	large	502	1360	858	Der große Wundervogel in tiefem Schlaf die Welt
308	123	16	SMALL	tiny	584	1150	567	Was rollt so zierlich klingt so lieb
309	124	16	SMALL	tiny	399	1441	1041	Wie zierlich sie gebaut
310	125	16	SMALL	tiny	491	1328	837	Dies zierliche und manierliche Wesen
1840	120	16	LARGE	gigantic	565	1462	897	Schlanken Riesen Kindern gleich
539	124	16	SMALL	weak	582	939	356	Vor Hunger schwach und matt
540	282	16	SMALL	weak	594	1462	868	Und nach einem schwachen Stege spähen
2186	476	16	LARGE	strong	483	1420	937	Mit starkem füllet
604	125	16	SMALL	delicate	520	1439	920	Trugs auf dem Rücken zart
605	280	16	SMALL	delicate	432	1623	1191	An seinem Lager knien die zarten Erben
603	408	16	SMALL	delicate	591	1416	825	Das Sehnen das die zartsten Bande flicht
20	20	16	SMALL	fearful	507	1561	1054	Ich fürcht nicht Gespenster
162	137	17	SMALL	small	460	1467	1007	Ich seh dich stolzer Feind den kleinen Haufen fliehn
1695	137	17	LARGE	large	639	1019	380	Nur schone wie bisher im Lauf von großen Thaten
2192	137	17	LARGE	strong	582	1227	644	Hemmt Friedrich und dein starker Arm
21	21	17	SMALL	fearful	494	1571	1076	Das Grab auf mich Ich fürcht es nicht
180	146	18	SMALL	small	457	1602	1145	Kleines Ding mit Müh und Leiden
1844	146	18	LARGE	gigantic	510	1282	772	Daß mit Riesen Schritt zu dir
22	22	18	SMALL	fearful	527	1493	966	Lieben hassen fürchten zittern
23	23	19	SMALL	fearful	527	1493	966	Wir pflanzen Waffen in ihre Hand die sich fürchterlich krampft
188	154	20	SMALL	small	545	1258	713	Die kleine Bank und wo das Hüttchen stund
189	155	20	SMALL	small	444	1646	1202	Lieb deucht mir jedes Drecklein itzt
191	156	20	SMALL	small	507	1561	1054	Mein bestes Stücklein preis
192	157	20	SMALL	small	576	1466	891	Ein ganz kleines Elfchen im Walde schlief
195	159	20	SMALL	small	419	1515	1095	Und über eine kleine Weil
196	160	20	SMALL	small	460	1467	1007	Ist meiner Liebsten kleines Haus gelegen
1715	155	20	LARGE	large	577	1134	556	Zu großem Schrecken an der Wand
1716	156	20	LARGE	large	483	1258	774	Mein Haus ist groß und weit mein Hof
1717	156	20	LARGE	large	619	1364	744	Meine Sippschaft ist gar groß
1719	293	20	LARGE	large	568	948	380	Vor diesem Bild so schweigend und so groß
1720	338	20	LARGE	large	487	1356	869	Finster und groß ins Unendliche
1718	797	20	LARGE	large	511	1364	852	Vermummte Gäste groß und viel
311	223	20	SMALL	tiny	513	1458	945	An leichten Ketten zierlich aufgehangen hier
312	224	20	SMALL	tiny	612	1165	554	Liegt um den zierlichen Kopf geschlagen
313	226	20	SMALL	tiny	479	1213	734	Und ich zauderte noch auf den zierlichen Teppich zu treten
314	227	20	SMALL	tiny	532	1540	1008	Zierlich ist des Vogels Tritt im Schnee
315	227	20	SMALL	tiny	400	1648	1248	Zierlicher schreibt Liebchens liebe Hand
1846	154	20	LARGE	gigantic	656	1412	756	Von weitem schon hört man den alten Riesen
1821	225	20	LARGE	gigantic	665	1380	715	Sechs gezähmter riesiger Schlangen
608	155	20	SMALL	delicate	457	1602	1145	Inmittelst läuft ein Spinnlein zart
609	226	20	SMALL	delicate	534	1213	678	Zartes Gebüsch umkränzet es erst hochstämmige Bäume
610	409	20	SMALL	delicate	457	1602	1145	Wer aber weiß ob nicht sein zarter Geist
2246	155	20	LARGE	rough	690	1087	397	Ihr Störch und Schwalben grobe Spatzen
2304	918	20	LARGE	rough	646	1274	629	der Grobian Da komm ich grunzend angeschossen
24	24	20	SMALL	fearful	414	1481	1067	Doch fürchtet sie auch fürchten ist ihr selig
1528	741	20	LARGE	angry	456	1534	1078	Noch scherzend in der Frühlingsstürme Wut
1722	484	21	LARGE	large	566	1319	754	Da wird ein großes Gotteswunder klar
1721	685	21	LARGE	large	520	1176	655	Groß äugig lauscht der Bube
1723	798	21	LARGE	large	437	1238	801	Groß vor ihm steht Einer im dunkeln Gewand
1822	798	21	LARGE	gigantic	552	1220	668	Viel riesige hohe Gestalten nahn
25	25	21	SMALL	fearful	593	1170	577	Stößt schweigend und fürchtend vom Lande
27	27	22	SMALL	fearful	531	1287	756	O fürchte nicht wenn dir das Alter
219	179	23	SMALL	small	438	1618	1180	Gönnt mir die kleine Zelle weiht mich ein
220	180	23	SMALL	small	474	1379	904	Doch Harmosan befürchtet Gift und zaudert eine kleine Zeit
221	181	23	SMALL	small	536	1041	505	Du bist so klein o Rom
1746	181	23	LARGE	large	565	1462	897	Beim großen Karl in Aachen
1748	492	23	LARGE	large	577	1334	756	Des großen Karls Gemüt
1744	699	23	LARGE	large	512	1516	1003	Den großen Unerreichlichen erreichen
1742	810	23	LARGE	large	523	1106	582	Weinen um den großen Toten
1743	811	23	LARGE	large	566	1499	934	Wie werd ich je dies große Rätsel fassen
1747	812	23	LARGE	large	528	1427	899	Der Ahnen große Züge sich geschrieben
1851	833	23	LARGE	gigantic	577	1452	875	Wie Riesen an des Markusplatzes Schwellen
1852	834	23	LARGE	gigantic	549	1350	801	Der Riesen Treppe staunend und bezahlet
622	414	23	SMALL	delicate	454	1309	855	Weh ihm wenn die Natur zarteren Bau vielleicht
28	28	23	SMALL	fearful	572	1137	564	Doch Harmosan befürchtet Gift und zaudert eine kleine Zeit
225	184	24	SMALL	small	582	1291	709	Wo hat man den kleinsten zum König gemacht
1749	604	24	LARGE	large	582	1227	644	Mit großem Sack und großem Bart
553	184	24	SMALL	weak	574	1516	942	Wo tritt der Schwache den Starken nieder
554	386	24	SMALL	weak	490	1503	1013	Ich schäme mich der schwachen Augenblicke
2206	184	24	LARGE	strong	552	1506	954	Wo tritt der Schwache den Starken nieder
2207	535	24	LARGE	strong	632	1202	569	Da trat ein starker Mann zum Baum
29	29	24	SMALL	fearful	483	1445	962	Wer nicht fürchtet unterzugehn
30	30	24	SMALL	fearful	615	1421	806	Da fürcht es sich gar sehr
241	196	25	SMALL	small	524	1326	801	Und kleine Wellen springen
634	418	25	SMALL	delicate	490	1277	786	Die zartesten und stolzesten der Lieder
635	419	25	SMALL	delicate	552	1506	954	Der Geliebten zarter Arm
33	33	25	SMALL	fearful	344	1218	874	Fürchtest du die Licht und Schatten
247	200	26	SMALL	small	438	1379	941	O Mensch wie klein bist du
248	201	26	SMALL	small	429	1625	1196	Wir weinten kleinen Kindern gleich
1780	200	26	LARGE	large	523	1344	821	Wie matt die großen Silberschilde funkeln
1781	200	26	LARGE	large	626	1442	815	Jauchzt nur entgegen jenem großen Tage
2222	201	26	LARGE	strong	483	1249	766	Auf auf ihr Brüder und seid stark
34	34	26	SMALL	fearful	476	1432	957	Da liegen sie vom fürchterlichen Schimmer
35	34	26	SMALL	fearful	382	1664	1282	Wie fürchterlich ist hier des Nachhalls Stimme
36	35	27	SMALL	small	621	1262	640	Die Musketenkugel macht ein kleines Loch
37	36	28	SMALL	small	527	1484	956	Die kleine einsame Hallig
38	37	29	SMALL	small	541	1457	916	Sind Söhne kleiner Männer
39	38	29	SMALL	small	509	1500	991	Wo ist der kleine Jakob geblieben
40	38	29	SMALL	small	623	1182	559	Kleiner Jakob kleiner Jakob komm zu Haus
41	38	29	SMALL	small	618	1372	754	Wohin ist der kleine Jakob gegangen
1548	532	29	LARGE	large	578	1136	559	Dem Gott der groß und wunderbar
1549	532	29	LARGE	large	432	1028	596	Für sie um großen Tod zu werben
1550	543	29	LARGE	large	635	1354	718	So nenne mir das große Land
1551	544	29	LARGE	large	527	1493	966	Das ist die große Sache
1552	545	29	LARGE	large	443	1498	1055	Muß dies die große Sonne sein
2144	532	29	LARGE	strong	522	1391	868	Wir starker deutscher Männerchor
42	39	30	SMALL	small	490	1497	1007	Mit dem kleinen Kursbericht
324	232	30	SMALL	tiny	576	1428	851	Das winzig kleine Königlein
2259	232	30	LARGE	rough	400	1171	770	grober Bruder mein
2260	232	30	LARGE	rough	538	1381	842	Bin grob doch eingesessen
2261	232	30	LARGE	rough	474	1379	904	Ein grober Bauer ist er genannt
2262	232	30	LARGE	rough	457	1602	1145	seid ein grobe Maide
50	44	32	SMALL	small	527	1493	966	Wenn ich an mein Bänklein knie
52	46	32	SMALL	small	565	1462	897	Ruh fein still am kleinen Kissen
53	47	32	SMALL	small	490	1524	1035	Die Glöcklein daß sie duftend lind
54	48	32	SMALL	small	400	1648	1248	Jetzt die lieben Kindlein klein
1561	45	32	LARGE	large	487	1357	869	Und große Städte fliegen
1562	45	32	LARGE	large	621	1242	621	Doch fahren große Schiffe
1563	48	32	LARGE	large	476	1587	1111	Auf diesen Felsen groß
517	363	32	SMALL	weak	469	1274	804	Und er ist nur schwach verdämmet
518	364	32	SMALL	weak	574	1388	813	Vöglein euer schwaches Nest
2146	363	32	LARGE	strong	565	1462	897	Willst du nicht mit starken Armen
2145	898	32	LARGE	strong	539	1290	751	Russen Schweden stark verbündet
573	45	32	SMALL	delicate	527	1493	966	Mit ihren zarten Armen
574	364	32	SMALL	delicate	526	1413	887	In den zarten blauen Zelten
55	49	33	SMALL	small	542	1301	760	Die aus so enger Brust und mit so kleiner
56	49	33	SMALL	small	485	1348	862	Die kleine Gurgel lockt schnarrt zischt und pfeift zugleich
57	50	33	SMALL	small	481	1615	1133	In kleinen Zirkelchen bewegt in sanften Wirbeln umgeführet
58	51	33	SMALL	small	607	1252	645	Ein jeder auch der kleinste Ast
1564	760	33	LARGE	large	545	1258	713	Dieß große Rund geschaffen
299	51	33	SMALL	tiny	531	1166	635	Von zierlich weissen runden Ballen
575	49	33	SMALL	delicate	602	1108	506	In solche dünne Haut und zarten Schnabel schrencket
576	51	33	SMALL	delicate	479	1418	938	Selbst durch die zarten Blätter bricht
2241	49	33	LARGE	rough	692	1152	460	Singt sanft singt ungestüm bald grob bald klar und hell
2281	917	33	LARGE	rough	578	1320	742	der so grob
2282	917	33	LARGE	rough	574	1268	693	der Wirkung der Natur Durch der Erfahrung Licht beglückt entdeckte Spur Vertreiben allgemach des groben Irrtums Dünste
2283	917	33	LARGE	rough	556	1198	642	In ihrem schändlichen und groben Irrtum lassen
2284	917	33	LARGE	rough	656	982	326	grob oder zart
2285	917	33	LARGE	rough	498	1112	614	Was an demselbigen zu grob und feucht
59	52	34	SMALL	small	528	1530	1002	Es kriecht das kleine Wesen einher so sonderbar
60	53	34	SMALL	small	588	1373	785	Bist du der Rechte kleiner Molch
61	53	34	SMALL	small	457	1602	1145	Nimm kleiner Knirps dein Geld nur hin
63	55	34	SMALL	small	538	1381	842	Den warf in ehrner Pforte ein kleines Fensterlein
1566	238	34	LARGE	large	494	1128	634	Dies Kreuz war ihm zu groß und das zu schwer
1567	238	34	LARGE	large	588	1325	738	So schwer und groß war jenes andre nicht
1568	632	34	LARGE	large	599	1305	706	Ein harter Schlag ein großer Verlust
1565	761	34	LARGE	large	518	1436	918	Willkommen willkommen groß mächtiger Wind
1569	762	34	LARGE	large	666	1252	586	Ich unverwandt das große Bild betrachte
300	52	34	SMALL	tiny	437	1410	973	Wie alles auf dem Tische sie zierlich aufgebaut
1816	762	34	LARGE	gigantic	606	1403	796	Nackt langgestreckt die riesige Gestalt
519	55	34	SMALL	weak	499	1346	846	Ihn lockte tief da unten ein schwacher Dämmerschein
520	365	34	SMALL	weak	426	1118	691	Da ward zuletzt er müd und schwach
521	365	34	SMALL	weak	673	1323	650	Es war ein alter schwacher Mann
2148	396	34	LARGE	strong	507	1481	974	Mein starkes getreues mein redliches Tier
2147	899	34	LARGE	strong	429	1386	958	Mache dir dich stark zu zeigen
577	396	34	SMALL	delicate	476	1202	725	Die Jungfrau zart und wonnereich
1515	730	34	LARGE	angry	568	1010	441	Auf brüllt der Gereizte schäumend vor Wut
1516	731	34	LARGE	angry	457	1602	1145	Verkocht ich in stiller Wut
65	56	35	SMALL	small	700	1273	573	Sonst für Gewinn hat war klein Dir geachtet
66	57	35	SMALL	small	419	1315	895	Und nur ein kleines Hirn
67	57	35	SMALL	small	573	1225	652	Und von dem kleinen lerne wohl
68	58	35	SMALL	small	400	1171	770	Mich dünkt es selbst sie ist zu klein
70	59	35	SMALL	small	400	1472	1070	Schein Glück für meine Kleine
71	60	35	SMALL	small	419	1315	895	Nur eine kleine Zeit
1572	57	35	LARGE	large	584	1293	709	So groß schier als ein Weberbaum
1574	57	35	LARGE	large	645	1010	365	Und flunkerte und prahlte groß
1576	57	35	LARGE	large	524	1338	813	Ein großes Maul es auch nicht tut
1570	715	35	LARGE	large	510	1263	752	Bis ihn Jesus Christus groß und hehr
1578	764	35	LARGE	large	538	1497	959	Nicht bin ein großer reicher Mann
1580	765	35	LARGE	large	483	1249	766	Die Eskimo sind wild und groß
579	57	35	SMALL	delicate	476	1380	903	Ein Jüngling zart und fein
578	305	35	SMALL	delicate	568	948	380	So lieblich und so zart
72	61	36	SMALL	small	400	1171	770	und uns fehlt nur eine Kleinigkeit
73	61	36	SMALL	small	427	1319	891	Nur eine kleine Ewigkeit
1583	767	36	LARGE	large	538	1414	876	Mensch was sagt man von dem großen Kaiser
1584	767	36	LARGE	large	619	1392	774	Groß am Himmel stand die schwarze Wolke
1585	767	36	LARGE	large	637	1388	750	Und es war ein großes schwarzes Heer
74	62	37	SMALL	small	589	1475	886	Der kleine breite Mann
75	63	37	SMALL	small	400	1648	1248	Von ihren Kindern klein
87	71	38	SMALL	small	382	1664	1282	Ein kleines Lied Wie gehts nur an
88	72	39	SMALL	small	428	1625	1196	Zieht der Einsiedel sein Glöcklein
89	72	39	SMALL	small	344	1695	1351	Es fallen ihr die Löcklein
90	73	39	SMALL	small	400	1472	1070	Und siehe über ein Kleines
1588	444	39	LARGE	large	512	1275	762	Der ist so groß und weit und wunderbar
1589	444	39	LARGE	large	498	1225	728	Still vor großer seliger Lust
1590	768	39	LARGE	large	488	1435	946	Treten heimlich groß und leise
1591	769	39	LARGE	large	539	1219	680	Wie von künftigem großen Glück
1592	770	39	LARGE	large	510	1282	772	Der Wald ist groß du bist allein
1593	770	39	LARGE	large	494	1621	1128	Groß ist der Männer Trug und List
91	74	40	SMALL	small	546	1458	912	Und ich war ein kleines Kirchenlicht
92	75	40	SMALL	small	532	1540	1008	Kleine Mädchen gingen nach der Schule
1595	772	40	LARGE	large	499	1228	728	Und es sprach Papst Paul Die große Karthaus
1596	772	40	LARGE	large	484	1200	717	Kasteien zieht den Hochmut groß
1597	772	40	LARGE	large	482	1452	969	Die große Karthause schickt uns her
2156	648	40	LARGE	strong	619	1392	774	Sein Sinn ist fest seine Hand ist stark
2155	772	40	LARGE	strong	558	1188	628	Den Leib Bezähmen macht stählern und stark
93	76	41	SMALL	small	481	1328	847	Dann trät ich froh ins kleine Zimmer
94	76	41	SMALL	small	437	1292	854	Dann jauchzten meine kleinen Brüder
95	76	41	SMALL	small	568	1560	990	Ich glaub sein Vater webt dem Kleinen
303	219	41	SMALL	tiny	499	1379	880	Er sieht nicht der Reiter zierlichen Schwung
1828	242	41	LARGE	gigantic	612	1486	873	Um den Bug des Riesen Pferdes weht des Reiters gelbe Mähne
2158	650	41	LARGE	strong	483	1249	766	Dann schreit ich jauchzend durch die Welt Auf meinen Schultern stark und breit
2157	900	41	LARGE	strong	558	1188	628	Zwei Arme wünsch ich fest und stark
588	308	41	SMALL	delicate	444	1646	1202	Ihre Kleider zarte Nebel
97	78	42	SMALL	small	598	1356	758	Nur erst als kleine weisse wolke schwebt
2166	902	42	LARGE	strong	577	1452	875	Die losen binden an die starken schäfte
589	78	42	SMALL	delicate	523	1264	741	Der mond auf seinen zarten grünen matten
590	400	42	SMALL	delicate	530	1284	754	Du wie der morgen zart und licht
98	79	43	SMALL	small	469	1592	1122	Ein kleines Mädchen kniet davor
99	80	44	SMALL	small	482	1117	635	Ha wenn mir nun im kleinen Muschelwagen
1612	80	44	LARGE	large	531	1287	756	Auch mir zwar bin ich schon ein großes Mädchen
110	91	45	SMALL	small	479	1358	878	Liegt Euer kleiner weißer Hund
111	92	45	SMALL	small	639	1434	794	Das Glöcklein schellt der Vorhang sinkt
112	92	45	SMALL	small	565	1462	897	Wer ahnts daß ein Totenglöcklein klingt
1632	92	45	LARGE	large	482	1441	959	Wie eine große Lüge prahlt
307	93	45	SMALL	tiny	545	1426	880	Mit Schnörkelzügen zierlich in blankem Goldesschein
532	92	45	SMALL	weak	551	1321	770	Des Greises Hirn ist schwach und alt
2168	853	45	LARGE	strong	448	1272	823	Ja wohl ein Engel war es ein Schutzgeist stark und kühn
114	94	46	SMALL	small	382	1228	846	Zwei Stöcklein nur blühten zur Frist
115	95	47	SMALL	small	442	1449	1007	Und den tieferen Geist klein und gemein versteht
1639	263	47	LARGE	large	390	1204	813	Du die Großes zu sehn und froher die Götter zu singen
1640	263	47	LARGE	large	400	1171	770	Großes zu finden ist viel ist viel noch übrig und wer so
1641	264	47	LARGE	large	502	1522	1020	Und in der großen Seele ruhigahnend den Tod
1633	372	47	LARGE	large	599	1359	759	Delphi schlummert und wo tönet das große Geschick
1635	372	47	LARGE	large	541	900	359	Denn zur Freude mit Geist wurde das Größre zu groß
1636	401	47	LARGE	large	400	1171	770	Im Arme der Götter wuchs ich groß
1831	261	47	LARGE	gigantic	483	1249	766	Riesen Bild und umher grünte lebendiger
533	372	47	SMALL	weak	514	1518	1004	Denn nicht immer vermag ein schwaches Gefäß sie zu fassen
2172	264	47	LARGE	strong	578	1177	599	Von Starken der frohlockende Sohn des Höchsten
2169	372	47	LARGE	strong	536	1168	631	Hilft wie Schlummer und stark machet die Not und die Nacht
2170	372	47	LARGE	strong	444	1342	897	Unter den Menschen und noch noch fehlen die Starken zu höchsten
2171	526	47	LARGE	strong	545	1270	725	Die stark ausdauernde ward
594	401	47	SMALL	delicate	577	1452	875	Die zarten Arme strecken
116	96	48	SMALL	small	527	1493	966	Die kleine Harfe hinter dem Altar auf
118	98	48	SMALL	small	410	1446	1036	Die kleinen Maienglocken blühn
119	99	48	SMALL	small	565	1462	897	Eine kleine Spanne Zeit
1521	736	48	LARGE	angry	530	781	251	Die Nonne knirschte drob vor Wut
1522	737	48	LARGE	angry	616	1240	622	Die Nonne voll von welscher Wut
1523	737	48	LARGE	angry	568	966	398	Und rollt die Augen voller Wut
120	100	49	SMALL	small	344	1218	874	Für deine Taten viel zu klein
121	101	49	SMALL	small	507	1561	1054	Voll Angst bei meinem kleinsten Schmerzen
1643	100	49	LARGE	large	615	1401	786	Der Gottheit große Stadt begränzt nur durch sich selber
1644	100	49	LARGE	large	620	1211	591	Doch dreimal großer Gott es sind erschaffne Seelen
1645	100	49	LARGE	large	505	1366	860	Sie sind unendlich groß und wer sie will erzählen
535	100	49	SMALL	weak	507	1561	1054	Du Sonne blendst mein schwaches Licht
2174	904	49	LARGE	strong	587	965	378	So stark und doch nicht gnug geliebt
595	100	49	SMALL	delicate	609	1406	797	Der zarten Blätter Atlasgrau
596	402	49	SMALL	delicate	520	1415	895	Beym zarten Abdruck Deiner Zier
597	402	49	SMALL	delicate	531	1287	756	Ein ohne Blindheit zartes Herz
122	102	50	SMALL	small	444	1327	884	Ich sei zu klein gewesen
123	103	50	SMALL	small	494	1571	1076	Ihre Zahl wird täglich kleiner
1832	560	50	LARGE	gigantic	400	1472	1070	Riesenhaft fühle ichs weben
536	103	50	SMALL	weak	400	1171	770	Ihre Stimme ist zu schwach
2175	103	50	LARGE	strong	570	1408	837	Da erschallt ein starkes Dröhnen
1524	738	50	LARGE	angry	566	1379	813	An seiner Wut erprob ichs nur
1525	738	50	LARGE	angry	568	1048	480	Er schaut voll Wut wo fern in Einsamkeit
130	110	51	SMALL	small	344	1695	1351	Weißt du wie viel Mücklein spielen
1653	110	51	LARGE	large	697	1316	619	An der ganzen großen Zahl
138	118	52	SMALL	small	426	1296	868	So nieder und klein
159	134	53	SMALL	small	601	1389	787	Hell ein Glöcklein hört man schallen
160	135	53	SMALL	small	723	1282	558	Sprach Mein Land hat kleine Städte
1689	134	53	LARGE	large	523	1220	697	Ach den drückte große Not
1690	135	53	LARGE	large	532	1540	1008	Große Städte reiche Klöster
1691	135	53	LARGE	large	626	1000	374	Daß in Wäldern noch so groß
1692	791	53	LARGE	large	694	1331	636	Mit andern Herren groß
541	376	53	SMALL	weak	619	1392	774	Stark am Geist am Leibe schwach
2187	376	53	LARGE	strong	619	1392	774	Stark am Geist am Leibe schwach
606	376	53	SMALL	delicate	492	1257	765	Ritter Bürger zarte Fraun
161	136	54	SMALL	small	646	1274	629	So Kleiner hat der liebe Gott
2242	136	54	LARGE	rough	582	1227	644	Und sieh mit fein und grobem Sang
164	139	55	SMALL	small	633	1251	618	Wie war klein Klopferchen da froh
166	141	55	SMALL	small	468	1658	1190	Hoch lebe der kleine Liewenberg
173	142	55	SMALL	small	527	1493	966	Da merket ihn ein kleiner Mann
174	142	55	SMALL	small	476	1587	1111	Drauf flog es her wie Erbsen klein
1699	138	55	LARGE	large	400	1648	1248	Man sagt er ist viel Meilen groß
1700	138	55	LARGE	large	612	1486	873	Das schlägt der große Krebs dann mit seinem Schwanz entzwei
1701	141	55	LARGE	large	619	1364	744	Da geschah auf einmal einer großer Schlag
1703	141	55	LARGE	large	508	1456	948	Indem sein großer Zorn sich bricht
1706	680	55	LARGE	large	457	1602	1145	Einst hatt ein Schneider große Pein
1705	793	55	LARGE	large	562	1410	848	Da hält er ihm unter die Nase groß
295	142	55	SMALL	tiny	484	1572	1088	Wir sind ein winzig Völkelein
2193	907	55	LARGE	strong	565	1462	897	Ein starker Tabak ein Teufelstabak
2194	908	55	LARGE	strong	538	1496	958	Wessenhalb derselbe eine starke Prise nahm
2243	908	55	LARGE	rough	558	1188	628	Aller Kutscher Muster treu und fest und grob
2244	908	55	LARGE	rough	523	1415	892	Und sprach Ein grober Knüppel wie Er ist
2245	908	55	LARGE	rough	569	1316	746	Und sah den groben Pfund sich an und sprach
177	144	56	SMALL	small	491	1464	973	Mit einem kleinen Menschenbunde
178	145	57	SMALL	small	443	1259	816	War noch ein Stücklein Kuchen geblieben
179	145	57	SMALL	small	570	1432	861	Das kleinste Krümlein den letzten Splitter
1843	832	57	LARGE	gigantic	576	1466	891	Schmettert manche Riesen Eich in Splitter
545	379	57	SMALL	weak	582	1208	625	Und aus der Wimper zuckt ein schwacher Strahl
2196	289	57	LARGE	strong	409	1110	701	Zurück mit starken Hufen
2197	589	57	LARGE	strong	495	1175	680	Einen Jüngling stark und hoch
2195	832	57	LARGE	strong	599	1359	759	Die zwei andern seine starken Söhne
2255	915	57	LARGE	rough	619	1392	774	Der Stein ist todt du wirst beim kalten derben
181	147	58	SMALL	small	465	1344	878	Auch ein kleines Loblied bringen
182	148	59	SMALL	small	469	1592	1122	Drei kleine Menschen spielen Blindekuh
1707	148	59	LARGE	large	481	1615	1133	Ein weißer Vogel ist der große Himmel
183	149	60	SMALL	small	503	987	484	Hallo du kleine Mücke
184	150	60	SMALL	small	577	1452	875	Und dann die kleinen Mädchen
185	151	60	SMALL	small	656	1412	756	Der Page wo blieb der Page klein
186	152	60	SMALL	small	623	1337	713	Den kleinen erdbeschmutzten Band
187	153	60	SMALL	small	494	1571	1076	Streck dein kleines dickes Bein
1708	150	60	LARGE	large	628	1021	392	Brumbrum das große Bombardon
1709	794	60	LARGE	large	532	1540	1008	Gibt es ein Großes Weltgewissen
547	150	60	SMALL	weak	583	1385	801	Noch aus der Ferne tönt es schwach
546	380	60	SMALL	weak	645	1010	365	Der ließ mich im Stich als ich krank war und schwach
2198	909	60	LARGE	strong	700	1259	559	Er war halt stark im Trane
2199	910	60	LARGE	strong	575	1491	916	Des langen Peters stark zählige Sippe
1527	740	60	LARGE	angry	532	1565	1034	Immer heftiger in Wut gerät der Tyrann
197	161	61	SMALL	small	483	1249	766	Heb zum Himmel unsern Kleinen
215	175	62	SMALL	small	557	1520	962	Liebste Mutter in der Kirche wo des Mesners Glöcklein klingt
216	176	63	SMALL	small	588	1470	882	ein Mensch den kleinen Löffelzwerg
1738	806	63	LARGE	large	615	1402	787	Zwar Wölfe gäbs in großer Schar
1739	807	63	LARGE	large	548	1152	604	und entfaltet groß ein rotes Taschentuch
218	178	64	SMALL	small	382	1546	1164	Die kleinen Veilchen blühn
552	385	64	SMALL	weak	344	1259	914	Nur dies schwach Gemüthe
222	182	65	SMALL	small	500	1300	799	Und ein Glöcklein tönt herüber leise wundersamen Klang
223	183	65	SMALL	small	562	962	399	Schon wird der Schloßhof fast zu klein
224	183	65	SMALL	small	499	1105	606	Umsonst kein Laut kein kleinster Ton
1853	835	65	LARGE	gigantic	555	892	337	Und riesen hoch von wildem Sturm empört
1534	745	65	LARGE	angry	568	1010	441	Schnaubt wie ein Tiger heut vor Wut
1535	745	65	LARGE	angry	632	1446	814	Er sah nicht des Kameles Wut
226	185	66	SMALL	small	686	1181	494	Erwürgt das kleine fromme Lamm
227	186	67	SMALL	small	565	1443	878	In kleinem Kahn eine Fischerin
228	187	67	SMALL	small	511	1523	1011	Es war einmal ein kleiner Spitz
2208	606	67	LARGE	strong	621	1262	640	Und spricht von alter starker Zeit
237	193	68	SMALL	small	513	1401	888	Du machst doch keine kleiner Schneider
238	193	68	SMALL	small	589	1456	866	Der kleine Schneider war hinein
1763	193	68	LARGE	large	781	1154	373	Der Drang war groß
242	197	69	SMALL	small	399	1429	1029	so freudig stieg und fiel die kleine Brust
243	197	69	SMALL	small	483	1249	766	Hart an das Stämmchen duckt es still und klein
320	197	69	SMALL	tiny	419	1419	1000	wie erst dem Spiel dem zierlich heitren zu
244	198	70	SMALL	small	523	1404	881	Der Kleinen auf der Bank
245	198	70	SMALL	small	565	1443	878	Und bringt nach kleiner Weile
1779	820	70	LARGE	large	550	1244	694	Die Welt so groß und ich so klein
246	199	71	SMALL	small	489	1246	756	Es ist zu klein doch dehnt es sich aus
249	202	72	SMALL	small	565	1462	897	So schenkt mir ein einziges Stücklein Damast
1782	821	72	LARGE	large	565	1462	897	Spricht großer Meister warst du da
2257	540	72	LARGE	rough	453	1455	1001	Und schüttelt sie mit derber Räuberlust
250	203	73	SMALL	small	560	1326	765	Um ein kleines hingegeben hatte
251	203	73	SMALL	small	527	1493	966	Sich zu seinen nackten Kleinen nieder
252	203	73	SMALL	small	580	1347	766	Noch ein kleines schwaches Licht erblickte
253	203	73	SMALL	small	520	1137	617	Und ein Mann trat aus der kleinen Wohnung
1785	203	73	LARGE	large	520	1405	885	Den in einer großen Muschelschale
561	203	73	SMALL	weak	476	1586	1111	Noch ein kleines schwaches Licht erblickte
2248	203	73	LARGE	rough	577	1153	576	Und das grobe Haartuch seines Kleides
259	207	74	SMALL	small	438	1558	1120	Da werden dem Kinde die Äugelein klein
260	207	74	SMALL	small	526	1307	781	Und die kleinen neugierigen Hasen
261	208	74	SMALL	small	488	1444	956	Im grauen Röcklein nickt der
262	209	74	SMALL	small	555	1179	623	Der Eichschrank unter dem kleinen Troß
263	209	74	SMALL	small	506	1538	1031	Schmeißt die Fledermäuse die kleinen Gespenster
264	210	74	SMALL	small	592	1466	873	Zur Welt sechs allerliebste kleine Kätzchen
1788	617	74	LARGE	large	632	1210	578	Sah mit großen Augen das Christkind hervor
321	207	74	SMALL	tiny	419	1633	1214	Das ist die zierliche Kleine
322	210	74	SMALL	tiny	618	1322	704	Fürwahr es war ein zierlich Wochenbettchen
639	206	74	SMALL	delicate	460	1228	768	Du deren zarte Augen mich befragen
640	207	74	SMALL	delicate	497	1317	820	Mit dem zarten unschuldigen Munde
2249	914	74	LARGE	rough	673	1322	650	Wackrer heimatlicher Grobheit
2307	918	74	LARGE	rough	697	1020	323	Ohn Maaßen groben Cavalier
1542	752	74	LARGE	angry	494	1621	1128	Die Köchin rast ich kann der blinden Wut
265	211	75	SMALL	small	523	1392	869	Der Klein der Kurze ihr Fürst ist Li
266	211	75	SMALL	small	550	1253	703	Doch ist er auch klein so ist er nicht faul
1789	211	75	LARGE	large	530	1640	1110	Der Größte Herrscher der Großen
296	211	75	SMALL	tiny	506	1341	835	Doch der dort oben der winzige Heid
564	211	75	SMALL	weak	555	1179	623	Nicht ziemt laß Jenem so schwach und
565	211	75	SMALL	weak	438	1463	1025	Wie schwach loch wie schwankend da Gitter
2225	211	75	LARGE	strong	555	1362	807	Der Stärkste soll König der Starken sein
2226	211	75	LARGE	strong	474	1367	892	Und stark im Geiste gewaltig und klug
1545	754	75	LARGE	angry	526	1353	827	Auf schnell der Leu wut schnaubend im Flug
267	212	76	SMALL	small	526	1391	865	Ihr kleinen goldnen Sterne
641	423	76	SMALL	delicate	535	1443	907	Er sanft die zarten Töne singt
642	424	76	SMALL	delicate	532	1420	888	Zarte Träume schwimmen nach
268	213	77	SMALL	small	561	1390	828	Traurig tönt das Glöcklein nieder
269	214	77	SMALL	small	474	1481	1006	Sie waren geritten ein kleines Stück
270	215	77	SMALL	small	500	1338	838	Klein Roland spielt in freier Luft
274	215	77	SMALL	small	527	1474	947	Und wer dir gibt eine kleine Gab
284	216	77	SMALL	small	584	1293	709	Was will doch dieser kleine Fant
285	216	77	SMALL	small	565	1462	897	Ein kleiner Mann ein großes Pferd
1800	215	77	LARGE	large	619	1364	744	Des Klage war nicht groß
1803	216	77	LARGE	large	673	1303	630	Jung Roland nahm in großer Hast
1804	216	77	LARGE	large	538	1128	590	Ein großer Strom von Blute lief
1805	216	77	LARGE	large	607	1220	613	Milon besah den großen Rumpf
1806	391	77	LARGE	large	488	1164	677	Daselbst erhub sich große Not
1809	442	77	LARGE	large	477	1396	918	Wird eine große Zukunft erstehn
297	216	77	SMALL	tiny	444	1327	884	Doch bin ich nicht zu winzig mehr
1874	216	77	LARGE	gigantic	632	1198	565	Des Riesen Haupt am Speere
1875	216	77	LARGE	gigantic	632	1186	553	Des Riesen Rumpf am Boden
1876	216	77	LARGE	gigantic	624	1262	637	Den riesen Handschuh brachte
1865	425	77	LARGE	gigantic	697	1297	599	Zween Riesen schlafend lagen
1864	824	77	LARGE	gigantic	565	1462	897	O Sohn der Feind ist riesen stark
1882	838	77	LARGE	gigantic	545	1258	713	Die Riesen und Drachen in Wald und Feld
566	216	77	SMALL	weak	509	896	386	Vermeint Ihr mich zu jung und schwach
567	391	77	SMALL	weak	661	1213	552	Den Pferden wars so schwach im Magen
568	391	77	SMALL	weak	645	1040	394	Des Rößlein war so krank und schwach
569	392	77	SMALL	weak	444	1327	884	Ein schwacher Ruf der Not
2233	216	77	LARGE	strong	639	1434	794	Da sprach Herr Karl der starke Held
2235	216	77	LARGE	strong	632	1216	584	Ein Waffen stark und lange
2237	391	77	LARGE	strong	545	940	395	Von hohem Wuchs und starker Hand
2228	510	77	LARGE	strong	577	1273	695	Ein Jagdspieß stark und lang
2231	513	77	LARGE	strong	414	994	581	Das Fähnlein ist verloren Herr Ulrich blutet stark
2230	913	77	LARGE	strong	544	1147	602	Schon kommt er angezogen mit starkem Aufgebot
643	425	77	SMALL	delicate	581	1423	842	Die Zarte ganz allein
2252	216	77	LARGE	rough	488	1451	963	Daß ich erschlug den groben Wicht
1547	756	77	LARGE	angry	483	1267	784	Den Rittern in den Rücken fällt er mit grauser Wut
292	217	78	SMALL	small	524	1440	915	Er trägt ein kleines Hütchen
293	217	78	SMALL	small	499	1379	880	Und einen kleinen Degen
294	217	78	SMALL	small	582	1341	759	Der Mann im kleinen Hütchen
1813	217	78	LARGE	large	527	1484	956	Dieß ist die große Parade
2239	217	78	LARGE	strong	589	1169	580	Hat gar keinen starken Ton
317	228	79	SMALL	tiny	557	1520	962	In zierlich enge Grenzen
2204	346	79	LARGE	strong	602	1482	880	Doch ist noch immer der Talismann stark
621	228	79	SMALL	delicate	483	1249	766	Schloß seinen Namen rein und zart
2247	228	79	LARGE	rough	727	1214	487	Gar grob dazwischen kamen
2256	228	79	LARGE	rough	507	1561	1054	Recht derb geschnitten in das Holz
1762	229	80	LARGE	large	492	1245	753	Seine Geig auf den Rücken mit großer Lust
318	229	80	SMALL	tiny	670	1185	515	Und Abends tanzte man zierlich und nett
1811	426	81	LARGE	large	530	1108	578	Auch die blechene Dos und darin groß klumpigen Zucker
1812	727	81	LARGE	large	513	1556	1042	Mit großem Ernst verwies ichs ihm
323	231	81	SMALL	tiny	457	1602	1145	Eine zierlich ein Mangelholz und ein Desem
645	426	81	SMALL	delicate	545	1304	758	Aber die jüngere Welt ist zart und scheuet die Zugluft
646	426	81	SMALL	delicate	606	1003	396	Mütterchen nehmt sie auf Glauben So zart und schlank wie sie dasteht
2253	426	81	LARGE	rough	601	1468	867	Goß sie auf graues Papier den grob gemahlenen Kaffee
325	233	82	SMALL	tiny	437	1512	1075	wie winzig dünken mich Eure sieben Sachen
537	374	82	SMALL	weak	457	1602	1145	Mit meiner schwachen Stimme
2177	532	82	LARGE	strong	613	1436	822	Wenn dein starker Arm es will
2178	905	82	LARGE	strong	584	955	371	Zur starken stolzen Fahne der Partei
2179	906	82	LARGE	strong	499	1379	880	Und eine starke Wehr
326	234	83	SMALL	tiny	480	1539	1058	Wenn ich ein winziger lyrischer Zwerg
327	234	83	SMALL	tiny	531	1574	1042	Drei winzige Jährchen erst ist es her
2303	924	83	LARGE	rough	470	1426	955	Ich bin ein grober Streiter Und führ ein grobes Maul
593	259	85	SMALL	delicate	523	1392	869	Und Nonnen gehn durch zarten Schnee
1663	272	87	LARGE	large	573	1264	690	In der Dämmrung steht er groß und unerkannt
1656	669	87	LARGE	large	527	1215	688	Er setzt den großen goldnen Fuß voran
1665	670	87	LARGE	large	527	1493	966	Ein großes Sterbelied Bald dumpf bald grell
1667	670	87	LARGE	large	562	1439	876	Doch die Dämonen wachsen riesen groß
1668	785	87	LARGE	large	594	1386	792	Des großen Urwalds der im Wasser ruht
1818	272	87	LARGE	gigantic	490	1269	779	Aber riesig über glühnden Trümmern steht
1837	406	87	LARGE	gigantic	656	1287	630	In dem ein Kran mit Riesen Armen dräut
1819	670	87	LARGE	gigantic	569	1325	755	Ihr starker Leib ragt riesig aus den Kissen
1836	670	87	LARGE	gigantic	626	1031	405	Doch die Dämonen wachsen riesen groß
1834	829	87	LARGE	gigantic	546	1315	769	Sahn wir der Riesen Schlote Nachtfanale
1835	830	87	LARGE	gigantic	437	1398	961	Ragt Wrack auf Wrack bis tief im Riesen Schlunde
2180	272	87	LARGE	strong	538	1288	750	Von des Todes starken Vögeln weiß bedeckt
2181	670	87	LARGE	strong	527	1474	947	Ihr starker Leib ragt riesig aus den Kissen
601	406	87	SMALL	delicate	602	1373	770	Des fernen Abends zarte Müdigkeit
1679	279	88	LARGE	large	566	1485	919	Hier der Große sagt er
1842	681	90	LARGE	gigantic	558	1182	624	Hervorhub eine Riesen Hand
607	286	90	SMALL	delicate	593	1170	577	Oft Gestalten zart und mild
1587	306	91	LARGE	large	457	1602	1145	Dich zieh ich gewiß nicht groß
1817	306	91	LARGE	gigantic	527	1246	718	Und wachsen und steigen riesig empor
2153	556	91	LARGE	strong	476	1587	1111	Der König will entfliehen der Herzog hält ihn stark
587	306	91	SMALL	delicate	564	1144	580	Ihr Leib so glatt und zart und weich
1518	733	91	LARGE	angry	616	1159	542	Ein Knistern und ein Prasseln von Feuers Wut empor
1611	775	92	LARGE	large	493	879	385	Von groß Mut und Gerechtigkeit
1642	373	93	LARGE	large	527	1474	947	Wie groß im Jahr mein Vortheil sey
534	373	93	SMALL	weak	694	1331	636	Im Lesen war er anfangs schwach
2173	373	93	LARGE	strong	565	1178	612	Den Band und starke Schlösser hüten
1696	333	95	LARGE	large	697	1335	638	Das den großen Gedanken
1697	333	95	LARGE	large	565	1462	897	Ist ein großer Gedanke
611	341	96	SMALL	delicate	530	1238	708	Abendlüftchen im zarten Laube flüstern
637	421	97	SMALL	delicate	476	1410	934	Zart grüne Blättchen buchtig ausgeschweift
1787	822	98	LARGE	large	577	1452	875	Die großen Bäche alles Lebens gehn
2223	192	98	LARGE	strong	372	1672	1300	Ich lauschte wie die starken Wirbel mir im Blute rollten
1557	362	99	LARGE	large	615	1402	787	Sie luden Gäst in großer Zahl
516	362	99	SMALL	weak	645	1040	394	Sie legten als er krank und schwach
522	366	100	SMALL	weak	494	1621	1128	Gott ist stark auch in den Schwachen
2149	366	100	LARGE	strong	512	1284	772	Gott ist stark auch in den Schwachen
528	368	101	SMALL	weak	509	914	404	Und er sah elend aus und schwach
1599	651	102	LARGE	large	491	1328	837	Ach fahre weiter fort damit die große Schuld
529	369	102	SMALL	weak	494	1596	1102	Der in den Schwachen mächtig ist
530	370	102	SMALL	weak	486	923	437	Zur Verfolgung schwach und faul
2159	651	102	LARGE	strong	487	1095	608	Von außen quälet mich des Unglücks starke Fluth
1519	734	102	LARGE	angry	645	1210	566	Von innen Schrecken Furcht und aller Sünden Wut
542	377	103	SMALL	weak	510	1282	772	Mächtig sind des Kerkers Riegel doch dem Eifer allzu schwach
543	377	103	SMALL	weak	438	1379	941	Schon einmal rief er dich Schwachen wieder zur vergeßnen Pflicht
2191	377	103	LARGE	strong	494	1192	698	Stark wohl sind die Römerkrieger Wache haltend vor den Thüren
2189	452	103	LARGE	strong	532	1540	1008	Der fasset die Hand ihm wie fühlt er sich stark
2188	480	103	LARGE	strong	457	1602	1145	Es treibt auch dich ein starker Wille
544	378	104	SMALL	weak	457	1602	1145	Schwach sind seine Hände
548	381	105	SMALL	weak	457	1602	1145	Ihr Herren schon mich Alten ich bin ein schwacher Greis
556	388	106	SMALL	weak	621	1242	621	Und in der Kirche war noch schwacher Flimmer
557	388	106	SMALL	weak	533	1094	561	Kraftlos und schwach um weiter noch zu wallen
2213	388	106	LARGE	strong	487	1357	869	Und stark wie Felsen durch das Herz mir brechen
2214	388	106	LARGE	strong	579	1343	764	Ich gehe hin und öffne es stark im Hoffen
562	389	107	SMALL	weak	426	818	391	Einsam bin ich nun und schwach
2224	422	107	LARGE	strong	643	1164	520	Zeugte Söhne stark von Art
638	422	107	SMALL	delicate	426	1296	868	Töchter wie die Mutter zart
563	390	108	SMALL	weak	453	1529	1076	Möge schwach wie immer
570	393	109	SMALL	weak	457	1602	1145	Meinen schwachen Finger leiten
571	394	110	SMALL	weak	645	1040	394	Meine Tante war alt und schwach
647	394	110	SMALL	delicate	437	1280	842	Ohn Mitleid und zart Gefühl
1651	668	111	LARGE	large	520	1218	697	So wird die Lieb in uns mächtig und groß
1652	783	111	LARGE	large	547	1490	942	Die Welt ist groß laß sie betteln drin
600	405	111	SMALL	delicate	593	1286	693	Bald der zarte Ton verklingt
1681	407	112	LARGE	large	618	1309	691	Denn einen großen Altar sollst du bauen
1682	787	112	LARGE	large	582	1227	644	Alles Große muß im Tod bestehen
2185	787	112	LARGE	strong	382	1228	846	Grünt ihr frisch und kühn mit starkem Mut
602	407	112	SMALL	delicate	670	1289	618	Für Wunden gab er zarte Sorgsamkeit
1854	610	113	LARGE	gigantic	507	1561	1054	In ferner Riesen Zeit
2215	416	113	LARGE	strong	486	1175	689	Wo die starken Ströme brausen
623	415	113	SMALL	delicate	426	1118	691	Gläubig kühn und zart
624	416	113	SMALL	delicate	491	1498	1007	Liebe spricht in zarten Tönen
1859	420	114	LARGE	gigantic	545	1270	725	Die Riesen Faust geballet
636	420	114	SMALL	delicate	621	1359	737	Mit zarter Röthe prangen
1558	429	115	LARGE	large	540	1511	971	Sanft stellte der Große den Felsenmuth
1559	429	115	LARGE	large	599	1231	632	Was muthvoll der Große gedacht
1514	729	115	LARGE	angry	578	1320	742	So seid Ihr ein Opfer der Wut
1761	438	117	LARGE	large	509	1267	758	Da dacht ich allzu großem Glücke
1693	677	118	LARGE	large	578	1054	476	Daß du so groß als schön warst war uns fremd
1694	792	118	LARGE	large	490	1206	716	Wie groß du warst das ahndeten wir nicht
1841	831	118	LARGE	gigantic	555	1430	875	Von der Riesen Berge Spitzen
1858	499	119	LARGE	gigantic	457	1602	1145	Doch scheint ein Riesen Bild
2220	912	119	LARGE	strong	528	1530	1002	Kampf der starken Triebe wild
1541	751	120	LARGE	angry	542	1301	760	Der Kaiser flammt in Zornes Wut
1861	837	121	LARGE	gigantic	428	1537	1108	So fuhr Rolf Düring gen Riesen Heim
1862	837	121	LARGE	gigantic	556	1014	458	Und als er kam vor des Riesen Tor
2250	837	121	LARGE	rough	545	940	395	Zu Boden mußt Du grober Gast
2251	837	121	LARGE	rough	344	1218	874	Da fiel der Riese das war ihm zu grob
1543	753	121	LARGE	angry	426	1314	886	Seine Nüstern dehnte die schnaubende Wut
1544	753	121	LARGE	angry	568	966	398	Sie sah wohl hinauf mit dem Aug voll Wut
1814	516	122	LARGE	large	487	1356	870	Der große Friederich todt
1810	825	125	LARGE	large	456	1330	874	Hilf Gott wie groß wie braun gebrannt
1680	583	130	LARGE	large	479	1418	938	Auf hebt er seinen Becher ein großer Wurm liegt drin
2221	612	131	LARGE	strong	568	948	380	Der deutsche Jüngling fromm und stark
1783	614	132	LARGE	large	413	1193	781	Und sollt ich nimmer kommen Tirol ist groß genug
1784	614	132	LARGE	large	466	1295	830	Die wunderbare große vor ihnen aufgehellt
1860	614	132	LARGE	gigantic	624	1304	680	Dazwischen Riesen Bäche darunter Kluft an Kluft
1546	755	133	LARGE	angry	476	1466	991	Und graust Dich nicht Wächter die heulende Wut
1553	757	134	LARGE	large	443	1259	816	Ei Mutter bin ich so groß wie du
1517	732	135	LARGE	angry	470	1316	846	Furchtbar rot ist jetzt die Stunde Wut endzündet
1740	808	136	LARGE	large	438	1345	907	die große Kühle kommt
2203	808	136	LARGE	strong	565	1462	897	Bleib stark mein tapfres Herz
1520	735	139	LARGE	angry	607	1479	871	Die Helfer in des Sturmes Wut
1526	739	140	LARGE	angry	552	1188	636	An Wut den Furien an Ernst den Höllenrichtern
1536	732	141	LARGE	angry	457	1602	1145	Das bringt mich nicht in Wut
1582	766	142	LARGE	large	525	1248	723	Der Mond geht groß aus dem Abend hervor
1594	771	143	LARGE	large	570	1305	735	Und das Große reift indessen
1646	781	144	LARGE	large	565	1462	897	Ein groß Geheimniß Laß die Sorgen
1710	796	145	LARGE	large	589	1475	886	Wachsam bei dem großen Schatz
1711	796	145	LARGE	large	565	1443	878	Deine großen Feinde nahn
1845	796	145	LARGE	gigantic	494	1487	993	Liegt ein Riesen Schwert uralt
1733	804	146	LARGE	large	443	1259	816	Denn sind sie groß genug so kauf ich mir ein Schwein
1734	804	146	LARGE	large	619	1378	759	Das Ferklein wird ja groß ich spar auch keine Mühe
2202	804	146	LARGE	strong	447	1447	1000	Wohl aufgeschürzt mit starken Schritten
1735	805	147	LARGE	large	513	1589	1076	Herr Kurfürst Friedrich Wilhelm der große Kriegsheld
1736	805	147	LARGE	large	468	1458	990	Der auf dem Schimmel sitzet der Große Kurfürst ists
1737	805	147	LARGE	large	570	1432	861	Wär doch nicht rückwärts gangen der fürstlich große Mann
1741	809	148	LARGE	large	593	1170	577	Und alle Glocken groß und klein
2143	826	150	LARGE	strong	736	1135	399	Sultan Arslans starke Hand
2265	916	155	LARGE	rough	520	1227	706	Den ihre Meister selbst durch Grobheit auf sich laden
2266	916	155	LARGE	rough	542	1301	760	da man sich solcher grober heidnischer Possen hätte entschlagen
2274	916	155	LARGE	rough	588	1373	785	Sein grobes Compliment nach der Schweitzerischen Höflichkeit lautet
2276	916	155	LARGE	rough	543	1033	489	eben darum auch grob und unhöflich sein könne
2305	925	157	LARGE	rough	593	1311	718	Der große grobe macht den Wagen groß und grob
