# Supplementary material for: Contiguity-based sound iconicity: The meaning of words resonates with phonetic properties of their immediate verbal contexts
Source: PLoS One. 2019 May 16;14(5):e0216930. doi: 10.1371/journal.pone.0216930 (PMC6522027; doi:10.1371/journal.pone.0216930)
Supplement: S1 Data — The folder contains three files. Data used in the analysis are listed in allSamples.tab, which contains a table with one line per sample and nine columns: SampleNr (running index per sample), TitleNr (running index per title), AuthorNr (running index per author), Category (SMALL vs. LARGE), KW (the target word in English), F1 (frequency of the first formant in Mel), F2 (frequency of the second formant in Mel), dF (distance between F1 and F2), and Sample (line extracted from poem). The files allTitles.tab and allAuthors.tab list the titles and authors, respectively. (ZIP) [file pone.0216930.s006.zip › S6 Data/allTitles.tab]

TitleNr	Title
1	Die Kuh
2	Durchwachte Nacht
4	Der getreue Eckart
6	Erlebnis
7	Frühlingseinzug
8	Die Flucht Karls I.
9	Es gibt so bange Zeiten
10	Die erste Elegie
11	Gruppe aus dem Tartarus
12	Die Glockenjungfern
13	Klage
15	Der Geyerpfiff
16	Preis des Schöpfers
17	Harzreise im Winter
18	Schelm von Bergen
19	Die Sterne sind erblichen
20	Walpurgis
21	Irin
22	An das Herz
23	Aufbruch der Jugend
24	Nur zu!
25	Nächtliche Erscheinung zu Speier
26	Hussens Kerker
27	Unwandelbar
28	Harmosan
29	Die Rätsel der Elfen
30	Vom Büblein, das überall mitgenommen hat sein wollen
31	Der Graf von Habsburg
32	Der Ring des Polykrates
33	Fortunat
34	Die Fürstengruft
35	Fridericus Rex
36	Der Halligmatrose
37	Der Stromgeiger auf Starkoddurs Grabe
38	Klage um den kleinen Jakob
39	Der Welt Herr
40	Der Kaiser und der Abt
41	Die Kuh
42	Lenore
44	Das buckliche Männlein
45	Ein Fischer saß im Kahne
46	Kettenlied eines Sklaven an die Fesselnde zur letzten Stunde des Jahres geschlossen
47	Komm heraus, komm heraus, o du schöne, schöne Braut
48	Lureley
49	Die Nachtigall, und derselben Wett-Streit gegen einander
50	Gedanken bey dem Fall der Blätter im Herbst
51	Kirsch-Blühte bey der Nacht
52	Das Riesen-Spielzeug
53	Der rechte Barbier
55	Die Männer im Zobtenberge
56	An – als Ihm die – starb
57	Die Geschichte von Goliath und David,in Reime bracht
58	Die Mutter bei der Wiege
59	Ein Wiegenlied bei Mondschein zu singen
60	Motet
61	Der Arbeitsmann
62	Der Frosch
63	Frau Schwalbe
64	Am Bodensee
65	Das Hirtenfeuer
66	Die beschränkte Frau
67	Die junge Mutter
69	Im Moose
70	Vorgeschichte
71	Ein kleines Lied
72	Die Nachtigallen
73	Wanderlied der Prager Studenten
74	Lebenswege
75	Würd' es mir fehlen, würd' ich's vermissen?
76	Aus dem schlesischen Gebirge
77	Die Ehre Gottes aus der Natur
78	Der hügel wo wir wandeln liegt im schatten
79	Ein Grab
80	Als der erste Schnee fiel
81	Das Göttliche
82	Den Vereinigten Staaten
85	Kleine Blumen, Kleine Blätter
86	Singet nicht in Trauertönen
88	Vermächtnis
89	Wandrers Sturmlied
91	Botenart
92	Der alte Komödiant
93	Deutscher Brauch
94	Barbarazweige
95	Das Unverzeihliche
96	Auftrag
98	Frühlingslied
99	Lebenspflichten
100	Morgen-Gedanken
101	Trauer-Ode, beim Absterben seiner geliebten Mariane
102	Das alte Haus
103	Der Tod kennt den Weg
104	Abenddämmerung
105	Ich weiß nicht was soll es bedeuten
107	Mein Kind, wir waren Kinder
108	Schlachtfeld bei Hastings
109	Wir saßen am Fischerhause
110	Weißt du, wie viel Sterne stehen
111	Du siehst mich an und kennst mich nicht
112	Schlacht bei Pavia
113	Die Stunden! wo wir auf das helle Blauen
114	Grossmutter und Enkel
115	Über Vergänglichkeit
116	Wir sind aus solchem Zeug wie das zu Träumen
117	Zuweilen kommen niegeliebte Frauen
118	Der Sommer-Tag
119	Abendlied
120	Aber auch den Föhrenwald
121	An das Herz
122	An einer Kindesleiche
123	Der Narr des Grafen von Zimmern
124	Der Taugenichts
125	Die kleine Passion
128	Jung gewohnt, alt getan
134	Der Geiger zu Gmünd
135	Der reichste Fürst
136	Der Stieglitz
137	An die preußische Armee
138	Der große Krebs im Mohriner See
139	Der Klopfer
141	Der Schneiderjunge von Krippstedt
142	Des kleinen Volkes Ueberfahrt
144	Nachlaß
145	Der offene Schrank
146	An mein Herz
147	Lob der Faulheit
148	Die Stadt
149	Ballade in U-dur
150	Die Musik kommt
151	König Abels Tod
152	Wer weiß wo
153	Wiegenlied
154	Besuch in Urach
155	Der alte Turmhahn
156	Die schlimme Gret und der Königssohn
157	Elfenlied
159	Schön-Rohtraut
160	Zu viel
161	Soldaten-Abschied
162	Der kleine Hydriot
163	Der Leiermann
164	Est Est!
165	Frühlingseinzug
166	Heimkehr
167	Auf dem Canal grande
168	Bettlerballade
170	Das tote Kind
171	Fingerhütchen
172	Im Spätboot
174	Stapfen
175	Schöne Agnete
176	Vice versa
177	Lobt doch unsre stillen Feste
178	An den Mai
179	Der Pilgrim vor St. Just
180	Harmosan
181	Klagelied Kaiser Otto des Dritten
182	Bretagne
183	Von der Pumpe,
184	Die Rätsel der Elfen
185	An den Frieden
186	Curiose Geschichte
187	Was geh'n den Spitz die Gänse an?
190	Das Karussell
191	Der Panther
192	Vorfrühling
193	Der güldne Ring
194	Der Graf von Habsburg
196	Arion
197	Das Vöglein auf dem Weihnachtsbaum
198	Paul Gerhard
199	Meister Oluf
200	Die Fürstengruft
201	Kaplied
202	Der Gant
203	Der Wilde
204	Die Blütenfee
205	Die Glockenjungfern
206	Abschied
207	In Bulemanns Haus
208	Sommermittag
209	Sturmnacht
210	Von Katzen
211	Pipin der Kurze
212	Nacht
213	Die Kapelle
214	Junker Rechberger
215	Klein Roland
216	Roland Schildträger
217	Die nächtliche Heerschau
218	Der Geyerpfiff
219	Auf der Messe, da zieht es, da stürmt es hinan
220	Elegie
221	Im ernsten Beinhaus war's wo ich beschaute
222	Vermächtniss
223	Auf eine Lampe
224	Aufgeschmückt ist der Freudensaal
225	Die Hochzeit
226	Die schöne Buche
227	Jägerlied
228	Der Wirtshaustisch
229	Die Schweden in Rippoldsau
230	Nänie
231	Der siebzigste Geburtstag
232	Des Knaben Wunderhorn
233	Gedichte eines Lebendigen
234	Das Buch der Zeit - Lieder eines Modernen
238	Die Kreuzschau
239	Durchwachte Nacht
242	Löwenritt
243	Kriegslied
259	Es weicht die Nacht und überm Hügel
261	Heidelberg
263	Menons Klagen um Diotima
264	Patmos
272	Der Krieg I
276	Ein Traum von grosser Magie
278	Reiselied
279	Die Wienerin in Berlin
280	Poetentod
282	Schöne Brücke, hast mich oft getragen
286	Rudelsburg*
289	Die Heideschenke
293	Nachts
298	Miltons Rache
300	Neujahrsgeläute
301	Neujahrsglocken
302	Der wilde Jäger
305	Christiane
306	Frau Hitt
308	Der Blumen Rache
310	An Werther
327	Aus alten Märchen winkt es
331	Wettstreit
333	Der Zürchersee
338	Scheiden von Ihr
341	Adelaide
342	Auf grünen Bergen wird geboren
344	Welcher Lebendige, Sinnbegabte
346	Almansor
351	Das Ideal und das Leben
352	Das Lied von der Glocke
354	Die Götter Griechenlandes
355	Die Kraniche des Ibycus
362	Die treue Haut
363	Frühlingsschrei eines Knechtes aus der Tiefe
364	Wie so leis die Blätter wehn
365	Die Sonne bringt es an den Tag
366	Lied an Schleswig-Holstein
367	Der Haidemann*
368	Thies und Ose
369	Abend-Lied
370	Trost-Aria
371	Zu einem gemalten Band
372	Brot und Wein
373	Johann, der Seifensieder
374	Der Freiheit eine Gasse
375	Der Juengling in der Landschaft
376	Kaiser Rudolfs Ritt zum Grabe
377	Petrus
378	Die traurige Geschichte vom dummen Hänschen
379	Himmelstrauer
380	Der Haidebrand
381	König Karl am Meer
382	Die Füsse im Feuer
383	Friede auf Erden!
384	Schwüle
385	Trost für mancherley Thränen
386	Ich schäme mich der schwachen Augenblicke
387	Winterliche Stanzen
388	Die letzten Worte des Pfarrers zu Drottning auf Seeland
389	Lied eines alten schwäbischen Ritters an seinen Sohn
390	Wem ich dieses klage
391	Schwäbische Kunde
392	Tells Tod
393	Siehe wie ich trostlos weine
394	Der Tantenmörder
395	Spinnerlied
396	Die Löwenbraut
399	Mondesaufgang
400	Du schlank und rein wie eine flamme
401	Da ich ein Knabe war ...
402	Trauer-Ode, beym Absterben seiner geliebten Mariane,* Nov.
403	Sie saßen und tranken am Teetisch
405	Das Flüchtigste
406	Korn. Saaten. Und des Mittags roter Schweiß
407	Aufruf
408	Bei einer Kindesleiche
409	Im Winterboden schläft, ein Blumenkeim
410	Die Söhne Haruns
411	Einer Todten
412	Miltons Wache
413	Muß immer der Morgen wiederkommen
414	Lebensstimmung
415	Freiheit
416	Frühlingsgruß an das Vaterland
418	Das Sonett
419	Fortunat
420	Die Lilien
421	Die Eichensaat
422	Die Büßende
423	Arion
424	Schlaflied
425	Märchen
426	Der siebzigste Geburtstag
429	Kolumbus
438	Der Triumphator
439	Gesang des Abgeschiedenen
442	Ver sacrum
444	Auf meines Kindes Tod
446	Friedrich Rotbart
452	Dietrich von Berne
465	Hoffnung
468	Volkers Nachtgesang
470	Dornburg
476	Die Winzerin
480	Abendstille
484	Der Mönch von Heisterbach
492	Wittekind
494	Orpheus. Eurydike. Hermes
499	Das versunkne Schloß
510	Der Schenk von Limburg
513	Die Schlacht bei Reutlingen
516	Enzio's, des letzten Staufen, Tod
526	Der Rhein
532	Bundeslied
535	Kinderlied von den grünen Sommervögeln
537	Das Glück
540	Johannes Kant
543	Des Deutschen Vaterland
544	Vaterlandslied
545	Warum ruf' ich?
556	Schwerting der Sachsenherzog
560	Nachtlied
564	Der Tod des Tiberius
566	Der Blinde und der Lahme
583	Der Student von Prag
589	Die Werbung
604	Vom Bäumlein, das andre Blätter hat gewollt
606	Sonntags am Rhein
610	Das Lied vom Rhein
612	Die Wacht am Rhein
614	Hans Euler
617	Knecht Ruprecht
619	Die schöne Stadt
632	Ein Lied von der Weibertreue
640	Der Fundator
641	Der Tod des Erzbischofs Engelbert von Cöln
648	Gorm Grymme
650	Von unten auf!
651	Alß er durch innerlichen Trost bey der Ungeduld gestärcket wurde
652	Am dritten September
668	Annchen von Tharau
669	Den blutrot dort der Horizont gebiert
670	Die Dämonen der Städte
673	Erlebnis
677	Du, die das Unglück mit der Grazie Schritten
680	Die Heinzelmännchen
681	Heinrich der Heilige
685	Das Schloß im See
691	Über einem Grabe
699	Ich möchte, wenn ich sterbe, wie die lichten
715	Bei dem Grabe meines Vaters
727	Die Spinnerin
729	Kolumbus
730	Die Löwenbraut
731	Frisch gesungen!
732
733	Schwerting der Sachsenherzog
734	Alß er durch innerlichen Trost bey der Ungeduld gestärcket wurde
735	Der Normann
736	Die Nonne
737	Die Nonne
738	Zu Pferd! Zu Pferd!
739	Die seltsamen Menschen
740	Pidder Lüng
741	Die Liebe, sagt man, steht am Pfahl gebunden
742	Der Hugenot
743	König Etzels Schwert
744	Sehnsucht nach dem Tode
745	Von der Pumpe,
746	Das Lied von der Glocke
747	Der Spaziergang
748	Die Bürgschaft
749	Die Kraniche des Ibycus
751	Bischof Kletus
752	Von Katzen
753	Die Jagd des Moguls
754	Pipin der Kurze
755	Der Norfalls Thurm
756	Die Schlacht bei Reutlingen
757	Nach Jahren
758	Das Lied vom braven Manne
760	Morgen-Gebeth
761	Der alte Müller
762	Salas y Gomez raget aus den Fluten
764	Täglich zu singen
765	Urians Reise um die Welt,
766	Der Mond ist wie ein feurig Ros'
767	Anno Domini
768	Mittagsruh
769	Schöne Fremde
770	Waldesgespräch
771	Ist doch – rufen sie vermessen
772	Die große Karthause von Papst Paul
773	Der Bildhauer des Hadrian
774	Der Bauer und der Sohn
775	Der Löwe und der Fuchs
776	Der Zauberlehrling
781	Die Lampe
782	Die Grenadiere
783	Edward
785	Im Haar ein Nest von jungen Wasserratten
786	Ballade des Äusseren Lebens
787	Die Eichen
788	Ehescheidung
789	Wie schlafend unter'm Flügel ein Pfau den Schnabel hält
791	Der Ring
792	Sonett
793	Der starke Taback
794	Die nächtliche Trauung
796	Attila's Schwert
797	Die traurige Krönung
798	Nächtliche Erscheinung zu Speier
800	Hussens Kerker
801	König Etzels Schwert
802	Mit zwei Worten
803	Napoleon im Kreml
804	Der Milchtopf
805	Der treue Fehrbellin
806	Der Werwolf
807	Palmström
808	Nicht lange durstest du noch
809	Die Glocken zu Speier
810	Das Grab im Busento
811	Dies Labyrinth von Brücken und von Gassen
812	Venedig liegt nur noch im Land der Träume
813	Die erste Elegie
814	Herbsttag
816	An die Freude
819	Resignation
820	Des Fremdlings Abendlied
821	Kaiser Heinrichs Waffenweihe
822	Anrede
824	Der blinde König
825	Ein Friedhofsgang
826	Sultan Alp Arslan
827	Der Knabe im Moor
828	Mahomets Gesang
829	Beteerte Fässer rollten von den Schwellen
830	Der Tod der Liebenden im Meer
831	Germania an ihre Kinder
832	Die drei Indianer
833	Der Morgen lächelte zu meinem Glücke
834	Es scheint ein langes, ew'ges Ach zu wohnen
835	Reue
836	Das verschleierte Bild zu Sais
837	Rolf Düring
838	Siegfrieds Schwert
845	Die Vergeltung
849	Die Goldgräber
853	Die Martinswand
857	Im Grünen zu singen
898	Draus bei Schleswig vor der Pforte
899	Der alte Sänger
900	Aus Spanien
901	Rühret nicht daran
902	Der Freund der Fluren
903	Seefahrt
904	Trauer-Ode, beim Absterben seiner geliebten Mariane*
905	Die Partei
906	Wer ist frei?
907	Der starke Taback
908	Friedrichs des Zweiten Kutscher
909	Das alte Steinkreuz am Neuen Markt
910	Pidder Lüng
911	Stiller Freund der vielen Fernen, fühle
912	Im Walde
913	Die Döffinger Schlacht
914	Für meine Söhne
915	Der Wind ist fremd, du kannst ihn nicht umfassen
916	sammlung
917	vergnuegen
918	gedichte
920	divan
921	lieder
923	unpolitische
924	buch
925	brahmane
